# Supplementary material for: The Impact of the Choice of Magnetometers and Gradiometers in Source Reconstruction after Signal Space Separation
Source: Preprints.org preprint supplement (doi:10.20944/preprints201710.0165.v1), 2017-10-27
Supplement: Supplementary file 1 [file supplementary]

## Supplementary Material to: *The impact of the choice of magnetometers and gradiometers in source reconstruction after signal space separation. Sensors*

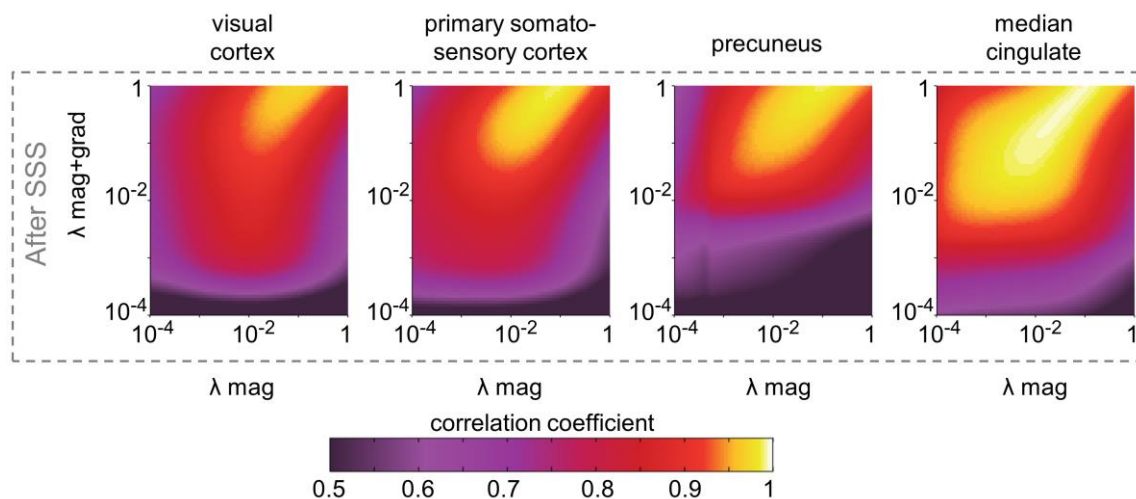

**Figure S1.** Correlation between source time series derived from magnetometers only and (magnetometers+gradiometers) depending of the  $\lambda$  regularization parameter. Pearson correlation coefficients averaged across subjects are shown for five selected sources, as a function of the regularization parameters  $\lambda$  for magnetometer (x-axis) and gradiometer (y-axis) beamforming reconstructions. For the (mag+grad) dataset, data for both sensor types was variance normalised. The selected sources were located in MNI space: visual cortex (MNI: -41, -77, 3), primary somatosensory cortex (MNI: -38 -27 52), precuneus (MNI: 1 -57 28) and median cingulate (MNI: -2 12 40).
